# Supplementary material
Source: publisher site journal article supplement (https://www.dovepress.com/article/455517)
Supplement: Supplementary file 1 [file get_supplementary_file.php]

Supplementary Table 1: English Version Focus Group Discussions Interview Guide for adoslecent groups used in the study exploring barriers to accessing adolescents’ sexual and reproductive health services in South Ethiopia Regional State 2023.

| **S.No.** | **Main Questions** | **Probing Questions** |
| --- | --- | --- |
|  | In your community how do you see the need of adolescents for sexual and reproductive health services? (**Approachability)** | 1. *Please elaborate on what will do if adolescents have a sexual and reproductive health problem. Why?* 2. *Would you elaborate on how adolescents get information about sexual and reproductive health services?* 3. *Please elaborate on whether all adolescents have the right to access sexual and reproductive health services in this community?* |
|  | In your community how do you rate the **availability** of sexual and reproductive health services care for adolescents? (**Availability)** | 1. *Please elaborate on how easy or difficult for adolescents to access services when they want.* 2. *Would you please elaborate on why it was difficult or easy? (Please elaborate on how?)* 3. *Can adolescents get the services when they require them?* |
| 1. ` | In your community how do you see the **acceptability** of adolescents' sexual and reproductive health services?  (**Acceptability)** | 1. *Please elaborate on a situation in which sexual and reproductive health services for adolescents are acceptable or not acceptable?* 2. *In this community, if one adolescent decides to seek health care services, can they get support to use the health services they need?* 3. *Please elaborate, on why some adolescents do not have access to sexual and reproductive health services?*   *(Is it due to a lack of information? Is it due to family-related issues? Is it due to social norms? Is it due to religion? Is it due to financial problems?)* |
|  | Do you think that sexual and reproductive health care services are **appropriate services** for adolescents? (**Appropriate)** | 1. *Would you elaborate on the fit between the needs of adolescents and the current sexual and reproductive health services provision?* |
|  | How might we increase the accessibility of sexual and reproductive health services for adolescents so that they are able to seek out the services when they are needed? | 1. *Would you elaborate on how can break the identified barriers?* 2. *Would you elaborate on possible strategies to improve accessibility?* 3. *Please elaborate, on what you would do if you saw someone had sexual and reproductive health problems.* 4. *Would you elaborate on the appropriate service delivery modality for adolescents?*  - *Using digital health modality Community-based modality* - *Health facility-based modality* - *School-based modality* |

Supplementary Table 2: English Version Key Informant Interview Guide for Health service providers used in the study exploring barriers to accessing adolescents’ sexual and reproductive health services in South Ethiopia Regional State 2023.

| **S.No.** | **Main Questions** | **Probing Questions** |
| --- | --- | --- |
|  | How do you see the sexual and reproductive health services provision for adolescents? | 1. *Is there a system for adolescents to have knowledge about their own health and where and when to get health services?* 2. *Overall, what does your institution think about the provision of reproductive health services to young adults compared to adults?* 3. *Do you think that young adults are treated differently from adults? why? And why not?* 4. *Do you think that married and unmarried young people are treated differently? why? And why not?* |
|  | In your community how do you see the need of adolescents for sexual and reproductive health services? | 1. What are sexual and reproductive health services adolescents typically seek from local healthcare facilities? 2. *How do you see convenient operating hours, a welcoming and clean environment, and maintaining privacy and confidentiality?* 3. *Does it have the equipment, medicines, supplies, and technology needed to ensure effective service provision to adolescents?* |
|  | In your community how do you see the **acceptability** of adolescents' sexual and reproductive health services? | 1. *If you decided to help adolescents with reproductive health problems, would there be any challenges related to providing sexual and reproductive health services for adolescents?* 2. *In general, How do you see acceptable sexual and reproductive health services for adolescents?* 3. *What are your views and opinions about providing SRH services to adolescents? Probe views about the provision of contraception, and HIV/AIDs services for adolescents* 4. *How do you see the right to access SRH information and services among adolescents?* |
|  | In your community **how do you rate** the accessibility of sexual and reproductive health services for adolescents? | 1. *How accessible are sexual and reproductive health services for adolescents?* 2. *Can they get it when they require it?* |
|  | From your point of view, do you think that sexual and reproductive health services are appropriate for adolescents? | 1. *How do you see the convenient your service is to adolescents?* 2. *How are your interactions with the adolescents?* 3. *Do adolescents participate in the provision of sexual and reproductive health services?* |
|  | How might we increase the accessibility of sexual and reproductive health services for adolescents so that they are able to seek out the services when they are needed? | 1. *Would you elaborate on how can break the identified barriers?* 2. *Would you elaborate on possible strategies to improve accessibility?* 3. *Please elaborate, on what you would do if you saw someone had sexual and reproductive health problems.* 4. *Would you elaborate on the appropriate service delivery modality for adolescents?*  - *Using digital health modality Community-based modality* - *Health facility-based modality* - *School-based modality* |

Supplementary Table 3: Demographic Characteristics of focus group discussants participated in the study exploring barriers to accessing adolescents’ sexual and reproductive health services in South Ethiopia Regional State 2023/24.

FGD_1 (Girls Groups)

| Participant Number | 1 | 2 | 3 | 4 | 5 | 6 | 7 | 8 | 9 | 10 | 11 | 12 | 13 | 14 |
| --- | --- | --- | --- | --- | --- | --- | --- | --- | --- | --- | --- | --- | --- | --- |
| Age | 17 | 18 | 12 | 13 | 17 | 19 | 15 | 18 | 18 | 11 | 14 | 16 | 16 | 16 |

FGD_2(Boys groups)

| Participant | 1 | 2 | 3 | 4 | 5 | 6 | 7 | 8 | 9 |
| --- | --- | --- | --- | --- | --- | --- | --- | --- | --- |
| Age | 17 | 18 | 12 | 13 | 17 | 19 | 15 | 18 | 18 |

FGD_3(Girls Groups)

| Participant | 1 | 2 | 3 | 4 | 5 | 6 | 7 | 8 | 9 |
| --- | --- | --- | --- | --- | --- | --- | --- | --- | --- |
| Age | 15 | 13 | 16 | 18 | 18 | 18 | 17 | 18 | 17 |

**FGD_4 (Boys Groups)**

| Code | P1 | P2 | P3 | P4 | P5 | P6 | P7 | P8 | P9 |
| --- | --- | --- | --- | --- | --- | --- | --- | --- | --- |
| Age | 18 | 18 | 18 | 18 | 19 | 17 | 16 | 17 | 19 |

FGD_5(Boys groups)

| Participant | 1 | 2 | 3 | 4 | 5 | 6 | 7 | 8 | 9 | 10 | 11 | 12 |
| --- | --- | --- | --- | --- | --- | --- | --- | --- | --- | --- | --- | --- |
| Age | 16 | 15 | 13 | 13 | 15 | 13 | 15 | 13 | 14 | 12 | 12 | 14 |

FGD_6(Girls_ **Groups**)

| Participant | 1 | 2 | 3 | 4 | 5 | 6 | 7 | 8 | 9 | 10 |
| --- | --- | --- | --- | --- | --- | --- | --- | --- | --- | --- |
| Age | 16 | 17 | 16 | 15 | 13 | 16 | 12 | 11 | 13 | 13 |

FGD_7(Girls_ **Groups**)

| Participant | 1 | 2 | 3 | 4 | 5 | 6 | 7 | 8 | 9 | 10 | 11 | 12 |
| --- | --- | --- | --- | --- | --- | --- | --- | --- | --- | --- | --- | --- |
| Age | 14 | 17 | 15 | 15 | 18 | 15 | 12 | 18 | 13 | 13 | 18 | 19 |

Supplementary Table 4: Demographic Characteristics of Key Informant Participants who participated in the study exploring barriers to accessing adolescents’ sexual and reproductive health services in South Ethiopia Regional State 2023/24.

| Participant | Age | Sex | Experiences | Profession |
| --- | --- | --- | --- | --- |
| KII 1 | 30 | Male | 10 years | BSC Nursing |
| KII 2 | 31 | Female | 11 years | Dipolma Midwifery |
| KII 3 | 32 | Male | 9 years | BSC Nursing |
| KII 4 | 37 | Female | 16 years | BSC Nursing |
| KII 5 | 31 | Male | 8 years | BSC Public health |
| KII 6 | 30 | Female | 8 years | BSC Public health |
| KII 7 | 35 | Male | 14 years | BSC Public health |
| KII 8 | 54 | Male | 30 years | BSC Nursing |
| KII 9 | 33 | Female | 6 years | BSC Midwifery |
| KII 10 | 31 | Female | 8 years | BSC Public health |
